1 To mBio (Research article)

2 Behaviors and Energy Source of *Mycoplasma gallisepticum* Gliding

3

4 Masaki Mizutani,<sup>a</sup> Makoto Miyata<sup>a,b</sup>#

5

6 <sup>a</sup>Graduate School of Science, Osaka City University, Sumiyoshi-ku, Osaka, Japan

7 <sup>b</sup>The OCU Advanced Research Institute for Natural Science and Technology

8 (OCARINA), Osaka City University, Sumiyoshi-ku, Osaka, Japan

9

10 Running Title: *Mycoplasma* gliding behaviors

11

12

13 # Address correspondence to Makoto Miyata, [miyata@sci.osaka-cu.ac.jp](mailto:miyata@sci.osaka-cu.ac.jp)

14

15

16

17 ABSTRACT

18 *Mycoplasma gallisepticum*, an avian-pathogenic bacterium, glides on host tissue  
19 surfaces by using a common motility system with *Mycoplasma pneumoniae*. In the  
20 present study, we observed and analyzed the gliding behaviors of *M. gallisepticum* in  
21 detail by using optical microscopes. *M. gallisepticum* glided at a speed of  $0.27 \pm 0.09$   
22  $\mu\text{m/s}$  with directional changes relative to the cell axis of  $0.6 \pm 44.6$  degrees/5 s without  
23 the rolling of the cell body. To examine the effects of viscosity on gliding, we analyzed  
24 the gliding behaviors under viscous environments. The gliding speed was constant in  
25 various concentrations of methylcellulose but was affected by Ficoll. To investigate the  
26 relationship between binding and gliding, we analyzed the inhibitory effects of  
27 sialyllactose on binding and gliding. The binding and gliding speed sigmoidally  
28 decreased with sialyllactose concentration, indicating the cooperative binding of the cell.  
29 To determine the direct energy source of gliding, we used a membrane-permeabilized  
30 ghost model. We permeabilized *M. gallisepticum* cells with Triton X-100 or Triton  
31 X-100 containing ATP and analyzed the gliding of permeabilized cells. The cells  
32 permeabilized with Triton X-100 did not show gliding; in contrast, the cells  
33 permeabilized with Triton X-100 containing ATP showed gliding at a speed of  $0.014 \pm$   
34  $0.007 \mu\text{m/s}$ . These results indicate that the direct energy source for the gliding motility

35 of *M. gallisepticum* is ATP.

36

### 37 **IMPORTANCE**

38 *Mycoplasmas*, the smallest bacteria, are parasitic and occasionally commensal.

39 *Mycoplasma gallisepticum* is related to human pathogenic *Mycoplasmas*—*Mycoplasma*

40 *pneumoniae* and *Mycoplasma genitalium*—which causes so-called ‘walking pneumonia’

41 and non-gonococcal urethritis, respectively. These *Mycoplasmas* trap sialylated

42 oligosaccharides, which are common targets among influenza viruses, on host trachea or

43 urinary tract surfaces and glide to enlarge the infected areas. Interestingly, this gliding

44 motility is not related to other bacterial motilities or eukaryotic motilities. Here, we

45 quantitatively analyze cell behaviors in gliding and clarify the direct energy source. The

46 results provide clues for elucidating this unique motility mechanism.

47

### 48 **INTRODUCTION**

49 Members of the bacterial class Mollicutes, including the genus *Mycoplasma*, are

50 parasitic, occasionally commensal, and characterized by small cells and genomes as

51 well as the absence of a peptidoglycan layer (1, 2). More than ten *Mycoplasma* species,

52 such as the fish pathogen *Mycoplasma mobile* (3-5) and the human pathogen

53 *Mycoplasma pneumoniae* (6-8), have membrane protrusions and exhibit gliding motility  
54 in the direction of the membrane protrusion on solid surfaces, which enables  
55 *Mycoplasmas* to parasitize higher animals.  
56 Interestingly, *Mycoplasma* gliding does not involve flagella or pili and is entirely  
57 unrelated to other bacterial motility systems and the conventional motor proteins that  
58 are common in eukaryotic motility systems (9, 10).  
59 The gliding motilities of *Mycoplasmas* are classified into two systems; *M. mobile*-type  
60 and *M. pneumoniae*-type (5, 8). *M. pneumoniae*-type gliding has until now been studied  
61 mainly in *M. pneumoniae* and *Mycoplasma genitalium*. A structure outline of the gliding  
62 machinery has been suggested, including that for fifteen component proteins (6-8, 11).  
63 The gliding machinery, called the ‘attachment organelle,’ is composed of an internal  
64 core and adhesin complexes (12-14). The internal core is divided into three parts, the  
65 bowl complex, paired plates, and terminal button (3, 6, 13-15). It has been suggested  
66 that the bowl complex connects the internal core to the cell body and may be  
67 responsible for the generation or transmission of force (8, 16, 17). Furthermore, paired  
68 plates are the scaffold for formation and force transmission of the gliding machinery (8,  
69 18-24). The terminal button is thought to tightly bind to the front side of the cell  
70 membrane (8, 23, 25-27). The adhesin complex is composed of P1 adhesin and P90 (28).

71 P90 is encoded in tandem with P1 adhesin and is cleaved from another protein, P40, for  
72 maturation (29, 30). A recent study shows that the homolog of P40/P90 in *M. genitalium*,  
73 P110, has a binding pocket of sialylated oligosaccharides (SOs) (31), which are binding  
74 targets for *Mycoplasma* infection and gliding. The mechanism of the gliding motility  
75 has been proposed as an ‘inchworm model,’ in which a cell catches SOs on solid  
76 surfaces through the adhesin complexes and is propelled by the repetitive extensions  
77 and retractions of the internal core (3, 7, 8).

78 The gliding motility of *M. mobile* is driven by ATP using ‘ghost’ which has a  
79 permeabilized membrane and can be reactivated by the addition of ATP (32-34). In  
80 contrast, the direct energy source for *M. pneumoniae*-type gliding motility is still  
81 unclear (8).

82 *Mycoplasma gallisepticum* is an avian pathogen that causes chronic respiratory disease  
83 in chickens and infectious sinusitis in turkeys. The cells transmit from breeder birds to  
84 their progeny *in ovo* (1, 35, 36). *M. gallisepticum* glides using the *M. pneumoniae*-type  
85 motility system and has eight homologs of component proteins of gliding machinery in  
86 *M. pneumoniae* whose identities for amino acids range from 20% to 45% (36-39). The  
87 structure of the gliding machinery is similar to that in *M. pneumoniae* (37, 39). *M.*  
88 *gallisepticum* has a faster growth rate and more stable cell shape than *M. pneumoniae*,

89 which is beneficial for the motility study (37).

90 In this study, we observe and analyze the gliding behaviors of *M. gallisepticum* in detail,  
91 and clarify the direct energy source of the gliding motility by modified gliding ghost  
92 experiments.

93

## 94 **RESULTS**

### 95 **Gliding behaviors**

96 The gliding motility of *M. gallisepticum* has been reported previously (37, 40), but the  
97 details have not yet been examined. Therefore, these details were examined in this study.  
98 *M. gallisepticum* cells were collected, suspended in phosphate-buffered saline (PBS)  
99 containing 10% non-heat-inactivated horse serum, and inserted into a tunnel chamber  
100 constructed by taping coverslips and precoated with non-heat-inactivated horse serum  
101 and bovine serum albumin. Then, the tunnel chamber was washed with PBS containing  
102 20 mM glucose (PBS/G) and was observed by phase-contrast microscopy. The cells  
103 showed a flask shape (Fig. 1A) and glided in the direction of the tapered end, as  
104 previously reported (Fig. 1B; see Movie S1 in the supplemental material) (37). The  
105 proportions of gliding cells to all cells and the gliding speeds averaged for 60 s at 1 s  
106 intervals were  $62\% \pm 6\%$  ( $n = 454$ ) and  $0.27 \pm 0.09 \mu\text{m/s}$  ( $n = 231$ ), respectively (Fig.

107 1B and C), which is consistent with those reported in the previous study (37). To  
108 analyze the gliding direction, we traced the angles between the cell axis and the  
109 following gliding direction for 60 s at 5 s intervals, as previously described (41). The  
110 averaged gliding direction relative to the cell axis was  $0.6 \pm 44.6$  degrees/5 s (n = 231)  
111 (Fig. 1D), indicating that *M. gallisepticum* has no significant directional bias.

### 112 **Possibility of rolling around the cell axis**

113 A previous study shows that the adhesin complexes of *M. pneumoniae* exist around the  
114 membrane protrusion (7). *M. gallisepticum* may have a similar distribution because it  
115 uses similar gliding machinery to *M. pneumoniae* (36-39). The distribution of adhesin  
116 complexes suggests that cells may roll around the cell axis during gliding. To examine  
117 this possibility, we traced the movement of 40 nm colloidal gold attached to a gliding  
118 cell. *M. gallisepticum* cells were biotinylated on the cell surface through amino groups,  
119 then mixed with 40 nm colloidal gold conjugated with streptavidin in the tunnel  
120 chamber and observed by dark-field microscopy. The cells attached with colloidal gold  
121 glided at a similar speed to cells without colloidal gold (see Fig. S1 and Movie S2 in the  
122 supplemental material). All pairs of mass centers of cells and colloidal gold moved  
123 while maintaining a constant distance (n = 20) (Fig. 1E; see Fig. S1 in the supplemental  
124 material), showing that the cells glide without rolling of the cell body.

125 **Gliding in viscous environments**

126 A previous study shows that *M. mobile* gliding is drastically inhibited by viscous  
127 environments created using methylcellulose (MC) or Ficoll (41). To examine the effects  
128 of viscosity on *M. gallisepticum* gliding, we analyzed the gliding behaviors under  
129 viscous buffers including MC or Ficoll. MC is a long, linear, and slightly branched  
130 polymer, and forms a gel-like three-dimensional network. Ficoll is a highly branched  
131 polymer which increases viscosity and does not form a network (42, 43). *M.*  
132 *gallisepticum* cells were suspended in PBS/G containing various concentrations of MC  
133 or Ficoll, inserted into the tunnel chamber, observed by phase-contrast microscopy, and  
134 analyzed for gliding speed and direction (Fig. 2A). The gliding speed did not  
135 significantly change with an increase in viscosity from  $0.22 \pm 0.06 \mu\text{m/s}$  ( $n = 50$ ) at 0.66  
136 mPa s to  $0.19 \pm 0.04 \mu\text{m/s}$  ( $n = 50$ ) at 7.3 mPa s with 0% and 0.50% MC, respectively.  
137 However, the gliding speed did significantly decrease to  $0.11 \pm 0.04 \mu\text{m/s}$  ( $n = 50$ ) at 4.6  
138 mPa s with 15% Ficoll ( $P < 0.001$  by Student's *t*-test) (Fig. 2B and C). The averaged  
139 gliding direction relative to the cell axis did not change significantly with an increase in  
140 viscosity for all examined conditions. However, the standard deviations of gliding  
141 direction significantly decreased in Ficoll conditions ( $P < 0.001$  by F-test) from 27.4  
142 degrees/5 s ( $n = 48$ ) in 0% to 12.4 degrees/5 s ( $n = 50$ ) in 15% Ficoll (Fig. 2B and C).



143 These results indicate that the gliding motility of *M. gallisepticum* is affected by Ficoll  
144 but not MC.

#### 145 **Inhibition of binding and gliding by free sialyllactose**

146 Previous studies show that *M. mobile* glides via dozens of working legs, the numbers of  
147 which can be reduced by the addition of free SOs (33, 44-46). To examine the  
148 relationship between binding and gliding, we added various concentrations of free  
149 3'-*N*-acetylneuraminyllactose (3'-sialyllactose, SL), an SO, to gliding *M. gallisepticum*  
150 cells. The cell suspension was inserted into the tunnel chamber and observed by  
151 phase-contrast microscopy. After 60 s, the buffer was replaced by the buffers containing  
152 0–0.5 mM SL. The gliding cells slowed down after the addition of free SL, and some of  
153 them detached from the glass surface (Fig. 3A and B). Most of the cells stopped for  
154 gliding kept binding to the end of the membrane protrusion (see Fig. S2 in the  
155 supplemental material). The inhibition ratio for binding was calculated from the number  
156 of gliding cells at 40 s after the addition of SL to the number before the SL treatments  
157 (45). The ratio decreased with SL concentration from 88% ± 11% (n = 14) in 0 mM to  
158 13% ± 11% (n = 21) in 0.5 mM SL (Fig. 3C). The gliding speed at 40 s after the  
159 addition of SL also decreased with SL concentration, from 0.17 ± 0.06 μm/s (n = 58) in  
160 0 mM to 0.06 ± 0.04 μm/s (n = 54) in 0.5 mM SL (Fig. 3D). The Hill constant of

161 binding was calculated as previously described (45) to be about 1.55 (see Fig. S3 in the  
162 supplemental material), indicating cooperativity in binding between cells and SL.

### 163 **Gliding ghost**

164 Previous studies show that the gliding motility of *M. mobile* is driven by ATP hydrolysis  
165 based on gliding ghost experiments. In these experiments, *M. mobile* cells were  
166 permeabilized with Triton X-100 and stopped for gliding. Gliding was then reactivated  
167 by the addition of ATP (32-34). In contrast, the reactivation of permeabilized cells of *M.*  
168 *pneumoniae*-type gliding *Mycoplasmas* has not been successful so far (8). At first, the  
169 same method was tried for *M. gallisepticum*, but about half of the cells permeabilized  
170 with Triton X-100 detached from the glass surfaces after the addition of ATP solution.  
171 Cells were permeabilized with Triton X-100 and ATP to efficiently observe the  
172 behaviors of permeabilized cells in the presence of ATP. This strategy was applied to *M.*  
173 *mobile* to confirm whether it was efficient. Cultured *M. mobile* cells were suspended in  
174 bufferA (10 mM HEPES pH 7.4, 100 mM NaCl, 2 mM MgCl<sub>2</sub>, 1 mM EGTA, 1 mM  
175 DTT, 0.1% MC) containing 20 mM glucose and inserted into the tunnel chamber. Then,  
176 the cells were permeabilized with 0.013% Triton X-100 containing 1 mM ATP + 0.01  
177 mM ADP or 1 mM ADP. The cells permeabilized with Triton X-100 containing 1 mM  
178 ATP + 0.01 mM ADP glided at a similar speed to the intact cells. The cells

179 permeabilized with Triton X-100 containing 1 mM ADP stopped gliding when they  
180 were permeabilized (see Movie S3 and S4 in the supplemental material). These results  
181 indicate that this method works efficiently. This method was then applied to *M.*  
182 *gallisepticum*. Cultured *M. gallisepticum* cells were suspended in bufferA containing  
183 10% non-heat-inactivated horse serum, inserted into the tunnel chamber, washed by  
184 bufferA containing 20 mM glucose, and observed by phase-contrast microscopy. Under  
185 these conditions, the proportion of gliding cells to all cells and the averaged gliding  
186 speed were  $74\% \pm 3\%$  ( $n = 2011$ ) and  $0.36 \pm 0.06 \mu\text{m/s}$  ( $n = 220$ ), respectively (see Fig.  
187 S4 in the supplemental material). The buffer was then replaced by 0.007% Triton X-100  
188 containing no ATP, 1 mM ATP + 0.01 mM ADP, or 1 mM ADP in bufferA. The cells  
189 became round at  $10 \square 30$  s from the addition of Triton solutions (Fig. 4A and B) causing  
190 the gliding speeds to decrease (Fig. 4C; see Fig. S5 in the supplemental material). The  
191 round cells showed three levels of cell-image density shifts; (i) the image density did  
192 not decrease, (ii) the image density decreased to be about 75% of the intact cell, (iii) the  
193 image density decreased to half of the intact cell (Fig 4D and E; see Fig. S5 in the  
194 supplemental material). The cells which decreased to be about 75% of the cell-image  
195 density showed slow gliding when they were permeabilized with Triton X-100  
196 containing 1 mM ATP + 0.01 mM ADP (Fig. 4A and C; see Fig. S5 and Movie S5 in the

197 supplemental material). The cells permeabilized with Triton X-100 containing no ATP  
198 or 1 mM ADP solution did not show gliding ( $n_{\text{intact}} = 3943$  and  $2604$ , respectively) (Fig.  
199 4F). These results indicate that we succeeded in forming gliding ghosts of *M.*  
200 *gallisepticum*. The occurrence ratio of gliding ghosts was calculated to be 0.41% from  
201 the numbers of gliding ghosts and intact cells before Triton treatment ( $n_{\text{intact}} = 11528$   
202 and  $n_{\text{ghost}} = 47$ ). The gliding speed of ghosts in 1 mM ATP + 0.01 mM ADP was  
203 averaged for 150 s at 10 s intervals and found to be  $0.014 \pm 0.007 \mu\text{m/s}$  (Fig. 4G). The  
204 62.9% of gliding ghosts continued to glide for 17 min of video recording. In the ATP  
205 hydrolysis cycle, the ATP state becomes the ADP or  $P_i$  state through the ADP +  $P_i$  state.  
206 Vanadate ion ( $V_i$ ) with ADP can mimic the ADP +  $P_i$  state.  $V_i$  acts as a phosphate analog  
207 to form an ADP- $V_i$  complex which occupies the catalytic site of ATPase and blocks the  
208 hydrolysis cycle (47, 48). The cells were permeabilized with Triton containing 1 mM  
209 ATP + 0.5 mM  $V_i$  to examine whether  $V_i$  affects the gliding of ghosts, (Fig. 4F). The  
210 gliding ghosts in ATP +  $V_i$  glided with  $0.011 \pm 0.010 \mu\text{m/s}$  ( $n = 9$ ) at an occurrence ratio  
211 of ghost to all intact cells 0.37% ( $n_{\text{intact}} = 2439$  and  $n_{\text{ghost}} = 9$ ) (Fig. 4H and I), similar to  
212 the ghosts constructed by Triton X-100 containing 1 mM ATP + 0.01 mM ADP.  
213 However, only 33.3% of ghosts continued to glide for 17 min of video recording under  
214 ATP +  $V_i$  conditions, which is half of the ghosts constructed by Triton X-100 containing

215 1 mM ATP + 0.01 mM ADP (Fig. 4J), suggesting that  $V_i$  gradually stopped the gliding  
216 of ghosts. These results indicate that the gliding motility of *M. gallisepticum* is driven  
217 by ATP hydrolysis.

## 218 **Damage to cell membranes by treatment with Triton X-100**

219 Cells treated with 0.007% Triton X-100 became round and showed three levels of  
220 cell-image density shifts (Fig. 4D and E; see Fig. S5 in the supplemental material).  
221 Negative-staining electron microscopy was carried out to analyze the morphological  
222 changes and cell-image density shifts in detail. Intact cells showed a pear-shape with a  
223 membrane protrusion called a ‘bleb’ and ‘infrableb,’ as previously reported (Fig. 5A)(37,  
224 49). Cells treated with Triton X-100 solution containing 1 mM ATP + 0.01 mM ADP  
225 showed a round cell shape (Fig. 5B), consistent with our observations by optical  
226 microscopy. Some of the cells had large or small holes on the cell membrane (Fig. 5C–  
227 E). These results indicate that the cells treated with Triton X-100 solution have a  
228 permeabilized membrane causing the loss of cytoplasm.

229

## 230 **DISCUSSION**

### 231 **Gliding behaviors**

232 In the present study, we observed and analyzed the gliding behaviors of *M.*

233 *gallisepticum* by using optical microscopes. The gliding speed of *M. gallisepticum*  
234 measured in the present study was about 0.27  $\mu\text{m/s}$  (Fig. 1C), which is comparable to  
235 the reported gliding speeds of *M. pneumoniae* and *M. genitalium*, about 0.64  $\mu\text{m/s}$  and  
236 0.15  $\mu\text{m/s}$ , respectively (39). A previous study shows that *M. genitalium* has curved  
237 attachment organelles and a circular trajectory of gliding, but the deletion mutant of  
238 MG\_217 protein shows straight attachment organelles and a straight trajectory,  
239 suggesting that the gliding direction is determined by the alignment of the attachment  
240 organelle (23). *M. gallisepticum* has non-bended attachment organelles (Fig. 5A) (37),  
241 and the average gliding direction was  $0.6 \pm 44.6$  degrees/5 s (Fig. 1D), which is  
242 consistent with previous observations (23, 41). However, cells sometimes glided to the  
243 left or the right (Fig. 1B). In these cases, the cells bind to glass surfaces at the end of the  
244 membrane protrusion so that the thermal fluctuations and drag of the cell body likely  
245 changes the gliding direction to left or right.  
246 *M. gallisepticum* did not roll around the cell axis during gliding (Fig. 1E; see Fig. S1 in  
247 the supplemental material). Previous studies show that *M. mobile* does not roll even  
248 with adhesin complexes working as a ‘leg’ around the membrane protrusion (41, 50, 51).  
249 *M. gallisepticum* and *M. mobile* glide on the ciliated epithelial cells of birds and the gills  
250 of fresh-water fish in nature, respectively. The distribution of adhesin complexes may be

251 an advantage for binding to host surfaces because these tissue surfaces are  
252 three-dimensionally aligned.

### 253 **Different inhibitory effects of MC and Ficoll on gliding**

254 In this study, it was found that MC and Ficoll have different inhibitory effects on *M.*  
255 *gallisepticum* gliding (Fig. 2). Previous studies show that a periplasmic flagellated  
256 bacterium whose flagella are located between the inner and outer membranes,  
257 *Brachyspira pilosicoli*, exhibits swimming at a constant speed in various concentrations  
258 of polyvinylpyrrolidone. These results show similar characteristics to MC, but the  
259 swimming speed decreased with Ficoll concentrations (43). External flagellated bacteria,  
260 *Pseudomonas viscosa*, *Bacillus brevis*, and *Escherichia coli*, increased swimming  
261 speeds in 1.33 mPa s of MC (52). Magariyama and Kudo suggested in 2002 that a  
262 gel-like three-dimensional network formed by MC makes a virtual tube around the cell  
263 body, and the body moves easily in the tube (42). This virtual tube may support the  
264 gliding motility of *M. gallisepticum*, enabling the cells to glide even in viscous  
265 environments constantly.

### 266 **Cooperativity in binding**

267 Binding and gliding speed sigmoidally decreased by free SL (Fig. 3C and D). Previous  
268 studies show that one adhesin complex of *M. pneumoniae* is composed of two

269 heterodimers, one of each is assembled by one P1 adhesin molecule and one P90  
270 molecule (28). The adhesin complex in *M. genitalium* is also composed of a dimer of  
271 heterodimers constructed by P110 and P140, the homologs of P1 adhesin and P90,  
272 respectively (53). P110 has a binding site for SOs, so one adhesin complex binds two  
273 SOs (31). The adhesin complex of *M. gallisepticum* is assumed to have two binding  
274 sites for SOs because it is composed of CrmA and GapA, the homologs of P110 and  
275 P140, respectively. This assumption is consistent with 1.55 of the Hill constant. The Hill  
276 constant of binding between *M. pneumoniae* cells and sialic compounds ranges from 1.5  
277 to 2.5 (45), comparable to 1.55 of the Hill constant for *M. gallisepticum* (see Fig. S3 in  
278 the supplemental material).

279 In 0.5 mM SL conditions, cells rotating around the end of the membrane protrusion  
280 were observed (see Fig. S2 in the supplemental material). A previous study shows that  
281 the ghosts of *M. mobile* exhibit directed rotational motility around the membrane  
282 protrusion driven by the linear motion of the legs (34). In contrast, rotary motion in *M.*  
283 *gallisepticum* seems to be driven by thermal fluctuation because it has no regularity of  
284 rotational direction (see Fig. S2 in the supplemental material), suggesting the possibility  
285 that adhesin complexes exist with high density at the end of the membrane protrusion.

286 **Energy source**



287 In the present study, we succeeded in forming the gliding ghosts of *M. gallisepticum* and  
288 clarified that the direct energy source of gliding is ATP (Fig. 4). In this method, we  
289 added 0.01 mM ADP to 0.007% Triton X-100 and 1 mM ATP solution because cells  
290 permeabilized with 0.007% Triton X-100 and 1 mM ATP solution easily detach from  
291 glass surfaces and ADP reduces these detachments.

292 In a previous study, the gliding ghosts of *M. mobile* glided at similar speeds to intact  
293 cells, and 85% of ghosts showed gliding (32). However, the gliding speed of *M.*  
294 *gallisepticum* ghosts was 4% of that of the intact cells, and 0.4% of the intact cells  
295 became gliding ghosts (Fig. 4I and J). Kawamoto *et al.* showed in 2016 that the  
296 translucent area surrounding the internal core in *M. pneumoniae* might be occupied by  
297 less-diffusive materials and play a role in transmitting the movements of the paired  
298 plates originating in the bowl complex to the adhesin complexes (7). The low  
299 occurrence ratio of gliding ghosts in *M. gallisepticum* may be caused by the  
300 permeabilization of cells resulting in the elution of less-diffusive materials. The cells  
301 treated with Triton X-100 show three levels of cell-image density shifts (Fig. 4D and E).  
302 The cells which decreased in the cell-image density to be 75% of the intact cells  
303 probably have permeabilized cell membranes which retain most of the less-diffusive  
304 materials.

305 In the gliding motility of *M. mobile*, complexes of MMOBs 1660 and 1670 in internal  
306 jellyfish-like structures have been proposed to hydrolyze ATP molecules as a motor (5,  
307 54). Therefore, which proteins work as a motor in the *M. pneumoniae*-type gliding  
308 system need to be identified. Fifteen component proteins of the attachment organelles in  
309 *M. pneumoniae* have been identified until now (8). One of these proteins has been  
310 annotated as Lon, an ATP-dependent protease (8). This protein possibly works as a  
311 motor for gliding.

312 Generally, respirable bacteria generate a proton gradient across the cell membrane in the  
313 respiratory process. The proton gradient causes proton motive force which drives F-type  
314 ATP synthase and bacterial flagella (55, 56). However, *Mycoplasmas* have no genes for  
315 electron transport and synthesize ATP molecules by glycolysis (57). The membrane  
316 potential of *M. gallisepticum* was  $-48$  mV, much smaller than that of typical bacteria,  
317 which is  $-150$  mV (58-61). Therefore, ATP is more convenient for *Mycoplasmas* for the  
318 energy source of gliding motilities rather than proton motive force.

319

## 320 **MATERIALS AND METHODS**

321 **Cultivation.** The *M. gallisepticum* S6 strain was grown in Aluotto medium at  $37^{\circ}\text{C}$ , as  
322 previously described (37).

323 **Observations of gliding behaviors.** The cells were cultured to reach an optical density  
324 at 595 nm of around 0.1. The cultured cells were collected by centrifugation at  $12,000 \times$   
325  $g$  for 10 min at room temperature (RT) and suspended in PBS consisting of 75 mM  
326 sodium phosphate (pH 7.3) and 68 mM NaCl. The cell suspension was centrifuged at  
327  $12,000 \times g$  for 5 min at RT, suspended in PBS containing 10% non-heat-inactivated  
328 horse serum (Gibco; Thermo Fisher Scientific, Waltham, MA), poured through a  
329 0.45- $\mu\text{m}$  pore size filter and incubated for 15 min at RT. Then, the cell suspension was  
330 poured twice more and inserted into a tunnel chamber which was assembled by taping  
331 coverslips cleaned with saturated ethanolic KOH and precoated with 100%  
332 non-heat-inactivated horse serum for 60 min and 10 mg/ml bovine serum albumin  
333 (Sigma-Aldrich, St. Louis, MO) in PBS for 60 min at RT. The tunnel chamber was  
334 washed with PBS containing 20 mM glucose, incubated at  $37^\circ\text{C}$  on an inverted  
335 microscope (IX83; Olympus, Tokyo, Japan) equipped with a thermo plate  
336 (MATS-OTOR-MV; Tokai Hit, Shizuoka, Japan) and a lens heater (MATS-LH; Tokai  
337 Hit), observed by phase-contrast microscopy at  $37^\circ\text{C}$  and recorded with a  
338 charge-coupled device (CCD) camera (LRH2500XE-1; DigiMo, Tokyo, Japan). Video  
339 data were analyzed by ImageJ 1.43u (<http://rsb.info.nih.gov/ij/>), as previously described  
340 (37, 41).

341 To investigate the effect of viscosity on gliding, the cultured cells were washed with  
342 PBS containing 10% non-heat-inactivated horse serum and 0.10%, 0.25%, and 0.50%  
343 MC (Methyl Cellulose #400; nacalai tesque, Kyoto, Japan) or 5%, 10%, and 15% Ficoll  
344 (M.W. 400,000; nacalai tesque, Kyoto, Japan), poured and incubated. Then, the cell  
345 suspension was poured and inserted into a cleaned and precoated tunnel chamber. The  
346 tunnel chamber was washed with various concentrations of viscous buffer containing 20  
347 mM glucose, observed by phase-contrast microscopy at 37°C and recorded. The  
348 viscosities were measured using dynamic viscoelasticity measuring apparatus  
349 (Rheosol-G5000; UBM, Kyoto, Japan) at 37°C as follows: 0.66 mPa s for PBS/G, 2.5,  
350 5.5, 7.3 mPa s for 0.10%, 0.25%, 0.50% MC, 2.3, 3.0, 4.6 mPa s for 5%, 10%, 15%  
351 Ficoll.

352 Cells on the tunnel chamber were treated with various concentrations of 3'-sialyllactose  
353 sodium salt (Nagara Science Co., Ltd, Tokyo, Japan) in PBS/G, observed by  
354 phase-contrast microscopy at 37°C and recorded to examine the binding features.

355 The cultured cells were collected, suspended in PBS containing 10 mM  
356 Sulfo-NHSLC-LC-Biotin (Thermo Fisher Scientific) and incubated for 15 min at RT to  
357 observe cell rolling. The cell suspension was centrifuged, suspended in PBS containing  
358 10% non-heat-inactivated horse serum, poured, and incubated. Then, the cell suspension

359 was poured and inserted into a cleaned and precoated tunnel chamber. The tunnel  
360 chamber was washed by PBS/G containing streptavidin conjugated 40 nm colloidal gold  
361 (Cytodiagnostics, Ontario, Canada), observed by dark-field microscopy using an upright  
362 microscope (BX50; Olympus) at 37°C and recorded by a CCD camera (WAT-120N;  
363 Watec Co. Ltd., Yamagata, Japan). Video data were analyzed by ImageJ 1.43u and  
364 IGOR Pro 6.33J (WaveMetrics, Portland, OR).

### 365 **Gliding ghost**

366 The cultured cells were collected and suspended in HEPES buffer (10 mM HEPES pH  
367 7.4, 100 mM NaCl). The cell suspension was centrifuged, suspended in bufferA, poured,  
368 and incubated for 15 min at RT. Then, the cell suspension was poured and inserted into  
369 a cleaned and precoated tunnel chamber. The tunnel chamber was washed with bufferA  
370 containing 20 mM glucose, observed by phase-contrast microscopy at 37°C, and  
371 recorded. After 70 s, the buffer was replaced with 0.007% Triton X-100 (MP  
372 Biomedicals, Santa Ana, CA) containing 1 mM ATP and 0.01 mM ADP or 0 mM ATP or  
373 1 mM ADP or 1 mM ATP and 0.5 mM Na<sub>3</sub>VO<sub>4</sub>. Video data were analyzed by ImageJ  
374 1.43u.

375 **Negative-staining electron microscopy.** The cultured cells were collected, suspended  
376 in PBS containing 10% non-heat-inactivated horse serum, poured through a 0.45-µm

377 pore size filter and incubated for 15 min at RT. Then, the cell suspension was placed on  
378 a carbon-coated grid and incubated for 10 min at RT. The grid was treated with 0.007%  
379 Triton X-100 containing 1 mM ATP and 0.01 mM ADP to permeabilize cells, incubated  
380 for 1 min at RT and fixed with 1% glutaraldehyde in bufferA for 1 min at RT. The fixed  
381 cells were washed with water, stained with 0.5% ammonium molybdate, and observed  
382 using a transmission electron microscope (JEM-1010; JEOL, Tokyo, Japan) at 80 kV  
383 equipped with a CCD camera (FastScan-F214 (T); TVIPS, Gauting, Germany).

384

#### 385 **ACKNOWLEDGMENTS**

386 We thank Yuhei O Tahara at Osaka City University for technical assistance with  
387 negative-staining electron microscopy. This work was supported by a Grant-in-Aid for  
388 Scientific Research in the innovative area of ‘‘Harmonized Supramolecular Motility  
389 Machinery and Its Diversity’ (Ministry of Education, Culture, Sports, Science, and  
390 Technology KAKENHI; grant number 24117002) and by a Grants-in-Aid for Scientific  
391 Research (A) (Ministry of Education, Culture, Sports, Science, and Technology  
392 KAKENHI; grant number 17H01544) to M. Miyata. M. Mizutani is the recipient of a  
393 Research Fellowship of the Japan Society for the Promotion of Science (18J15362).

394

395 **REFERENCES**

- 396 1. Razin S, Yogev D, Naot Y. 1998. Molecular biology and pathogenicity of  
397 mycoplasmas. *Microbiol Mol Biol Rev* 62:1094-156.
- 398 2. Razin S, Hayflick L. 2010. Highlights of mycoplasma research--an historical  
399 perspective. *Biologicals* 38:183-90.
- 400 3. Miyata M. 2008. Centipede and inchworm models to explain *Mycoplasma* gliding.  
401 *Trends Microbiol* 16:6-12.
- 402 4. Miyata M. 2010. Unique centipede mechanism of *Mycoplasma* gliding. *Annu Rev*  
403 *Microbiol* 64:519-37.
- 404 5. Miyata M, Hamaguchi T. 2016. Prospects for the gliding mechanism of  
405 *Mycoplasma mobile*. *Curr Opin Microbiol* 29:15-21.
- 406 6. Nakane D, Kenri T, Matsuo L, Miyata M. 2015. Systematic structural analyses of  
407 attachment organelle in *Mycoplasma pneumoniae*. *PLoS Pathog* 11:e1005299.
- 408 7. Kawamoto A, Matsuo L, Kato T, Yamamoto H, Namba K, Miyata M. 2016.  
409 Periodicity in attachment organelle revealed by electron cryotomography suggests  
410 conformational changes in gliding mechanism of *Mycoplasma pneumoniae*. *MBio*  
411 7:e00243-16.
- 412 8. Miyata M, Hamaguchi T. 2016. Integrated information and prospects for gliding

- 413 mechanism of the pathogenic bacterium *Mycoplasma pneumoniae*. Front Microbiol  
414 7:960.
- 415 9. Dandekar T, Huynen M, Regula JT, Ueberle B, Zimmermann CU, Andrade MA,  
416 Doerks T, Sanchez-Pulido L, Snel B, Suyama M, Yuan YP, Herrmann R, Bork P.  
417 2000. Re-annotating the *Mycoplasma pneumoniae* genome sequence: adding value,  
418 function and reading frames. Nucleic Acids Res 28:3278-88.
- 419 10. Jaffe JD, Stange-Thomann N, Smith C, DeCaprio D, Fisher S, Butler J, Calvo S,  
420 Elkins T, FitzGerald MG, Hafez N, Kodira CD, Major J, Wang S, Wilkinson J,  
421 Nicol R, Nusbaum C, Birren B, Berg HC, Church GM. 2004. The complete genome  
422 and proteome of *Mycoplasma mobile*. Genome Res 14:1447-61.
- 423 11. Seybert A, Gonzalez-Gonzalez L, Scheffer MP, Lluch-Senar M, Mariscal AM,  
424 Querol E, Matthaeus F, Pinol J, Frangakis AS. 2018. Cryo-electron tomography  
425 analyses of terminal organelle mutants suggest the motility mechanism of  
426 *Mycoplasma genitalium*. Mol Microbiol 108:319-329.
- 427 12. Meng KE, Pfister RM. 1980. Intracellular structures of *Mycoplasma pneumoniae*  
428 revealed after membrane removal. J Bacteriol 144:390-9.
- 429 13. Henderson GP, Jensen GJ. 2006. Three-dimensional structure of *Mycoplasma*  
430 *pneumoniae*'s attachment organelle and a model for its role in gliding motility. Mol



- 431           Microbiol 60:376-85.
- 432   14. Seybert A, Herrmann R, Frangakis AS. 2006. Structural analysis of *Mycoplasma*  
433       *pneumoniae* by cryo-electron tomography. J Struct Biol 156:342-54.
- 434   15. Hegermann J, Herrmann R, Mayer F. 2002. Cytoskeletal elements in the bacterium  
435       *Mycoplasma pneumoniae*. Naturwissenschaften 89:453-8.
- 436   16. Pich OQ, Burgos R, Ferrer-Navarro M, Querol E, Pinol J. 2006. *Mycoplasma*  
437       *genitalium mg200* and *mg386* genes are involved in gliding motility but not in  
438       cytadherence. Mol Microbiol 60:1509-19.
- 439   17. Jordan JL, Chang HY, Balish MF, Holt LS, Bose SR, Hasselbring BM, Waldo RH,  
440       3rd, Krunkosky TM, Krause DC. 2007. Protein P200 is dispensable for  
441       *Mycoplasma pneumoniae* hemadsorption but not gliding motility or colonization of  
442       differentiated bronchial epithelium. Infect Immun 75:518-22.
- 443   18. Popham PL, Hahn TW, Krebes KA, Krause DC. 1997. Loss of HMW1 and HMW3  
444       in noncytadhering mutants of *Mycoplasma pneumoniae* occurs post-translationally.  
445       Proc Natl Acad Sci U S A 94:13979-84.
- 446   19. Hahn TW, Willby MJ, Krause DC. 1998. HMW1 is required for cytoadhesion P1  
447       trafficking to the attachment organelle in *Mycoplasma pneumoniae*. J Bacteriol  
448       180:1270-6.

- 449 20. Seto S, Miyata M. 2003. Attachment organelle formation represented by  
450 localization of cytoadherence proteins and formation of the electron-dense core in  
451 wild-type and mutant strains of *Mycoplasma pneumoniae*. J Bacteriol 185:1082-91.
- 452 21. Kenri T, Seto S, Horino A, Sasaki Y, Sasaki T, Miyata M. 2004. Use of  
453 fluorescent-protein tagging to determine the subcellular localization of *Mycoplasma*  
454 *pneumoniae* proteins encoded by the cytoadherence regulatory locus. J Bacteriol  
455 186:6944-55.
- 456 22. Burgos R, Pich OQ, Querol E, Pinol J. 2007. Functional analysis of the  
457 *Mycoplasma genitalium* MG312 protein reveals a specific requirement of the  
458 MG312 N-terminal domain for gliding motility. J Bacteriol 189:7014-23.
- 459 23. Burgos R, Pich OQ, Querol E, Pinol J. 2008. Deletion of the *Mycoplasma*  
460 *genitalium* MG\_217 gene modifies cell gliding behaviour by altering terminal  
461 organelle curvature. Mol Microbiol 69:1029-40.
- 462 24. Bose SR, Balish MF, Krause DC. 2009. *Mycoplasma pneumoniae* cytoskeletal  
463 protein HMW2 and the architecture of the terminal organelle. J Bacteriol  
464 191:6741-8.
- 465 25. Jordan JL, Berry KM, Balish MF, Krause DC. 2001. Stability and subcellular  
466 localization of cytoadherence-associated protein P65 in *Mycoplasma pneumoniae*. J

- 467 Bacteriol 183:7387-91.
- 468 26. Chang HY, Prince OA, Sheppard ES, Krause DC. 2011. Processing is required for a  
469 fully functional protein P30 in *Mycoplasma pneumoniae* gliding and cytodherence.  
470 J Bacteriol 193:5841-6.
- 471 27. Hasselbring BM, Sheppard ES, Krause DC. 2012. P65 truncation impacts P30  
472 dynamics during *Mycoplasma pneumoniae* gliding. J Bacteriol 194:3000-7.
- 473 28. Nakane D, Adan-Kubo J, Kenri T, Miyata M. 2011. Isolation and characterization  
474 of P1 adhesin, a leg protein of the gliding bacterium *Mycoplasma pneumoniae*. J  
475 Bacteriol 193:715-22.
- 476 29. Layh-Schmitt G, Herrmann R. 1992. Localization and biochemical characterization  
477 of the ORF6 gene product of the *Mycoplasma pneumoniae* P1 operon. Infect  
478 Immun 60:2906-13.
- 479 30. Catrein I, Herrmann R, Bosserhoff A, Ruppert T. 2005. Experimental proof for a  
480 signal peptidase I like activity in *Mycoplasma pneumoniae*, but absence of a gene  
481 encoding a conserved bacterial type I SPase. FEBS J 272:2892-900.
- 482 31. Aparicio D, Torres-Puig S, Ratera M, Querol E, Pinol J, Pich OQ, Fita I. 2018.  
483 *Mycoplasma genitalium* adhesin P110 binds sialic-acid human receptors. Nat  
484 Commun 9:4471.

- 485 32. Uenoyama A, Miyata M. 2005. Gliding ghosts of *Mycoplasma mobile*. Proc Natl  
486 Acad Sci USA 102:12754-8.
- 487 33. Kinoshita Y, Nakane D, Sugawa M, Masaike T, Mizutani K, Miyata M, Nishizaka T.  
488 2014. Unitary step of gliding machinery in *Mycoplasma mobile*. Proc Natl Acad Sci  
489 USA 111:8601-6.
- 490 34. Kinoshita Y, Miyata M, Nishizaka T. 2018. Linear motor driven-rotary motion of a  
491 membrane-permeabilized ghost in *Mycoplasma mobile*. Sci Rep 8:11513.
- 492 35. Levisohn S, Kleven SH. 2000. Avian mycoplasmosis (*Mycoplasma gallisepticum*).  
493 Rev Sci Tech 19:425-42.
- 494 36. Indikova I, Vronka M, Szostak MP. 2014. First identification of proteins involved in  
495 motility of *Mycoplasma gallisepticum*. Vet Res 45:99.
- 496 37. Nakane D, Miyata M. 2009. Cytoskeletal asymmetrical dumbbell structure of a  
497 gliding mycoplasma, *Mycoplasma gallisepticum*, revealed by negative-staining  
498 electron microscopy. J Bacteriol 191:3256-64.
- 499 38. Indikova I, Much P, Stipkovits L, Siebert-Gulle K, Szostak MP, Rosengarten R,  
500 Citti C. 2013. Role of the GapA and CrmA cytoadhesins of *Mycoplasma*  
501 *gallisepticum* in promoting virulence and host colonization. Infect Immun  
502 81:1618-24.

- 503 39. Miyata M, Nakane D. 2013. Gliding mechanism of the *Mycoplasma pneumoniae*  
504 subgroup implications from studies on *Mycoplasma mobile*. in Molecular and Cell  
505 Biology of Mollicutes, eds G Browning and C Citti (Norfolk: Horizon  
506 Press):237–252.
- 507 40. Erdmann T. 1976. Untersuchungen zur morphologie, vermehrung und  
508 beweglichkeit von *Mycoplasma gallisepticum*. MD thesis Johannes Gutenberg  
509 Universita't, Mainz, Germany.
- 510 41. Morio H, Kasai T, Miyata M. 2016. Gliding direction of *Mycoplasma mobile*. J  
511 Bacteriol 198:283-90.
- 512 42. Magariyama Y, Kudo S. 2002. A mathematical explanation of an increase in  
513 bacterial swimming speed with viscosity in linear-polymer solutions. Biophys J  
514 83:733-9.
- 515 43. Nakamura S, Adachi Y, Goto T, Magariyama Y. 2006. Improvement in motion  
516 efficiency of the spirochete *Brachyspira pilosicoli* in viscous environments.  
517 Biophys J 90:3019-26.
- 518 44. Nagai R, Miyata M. 2006. Gliding motility of *Mycoplasma mobile* can occur by  
519 repeated binding to *N*-acetylneuraminyllactose (sialyllactose) fixed on solid  
520 surfaces. J Bacteriol 188:6469-75.

- 521 45. Kasai T, Nakane D, Ishida H, Ando H, Kiso M, Miyata M. 2013. Role of binding in  
522 *Mycoplasma mobile* and *Mycoplasma pneumoniae* gliding analyzed through  
523 inhibition by synthesized sialylated compounds. J Bacteriol 195:429-35.
- 524 46. Mizutani M, Tulum I, Kinoshita Y, Nishizaka T, Miyata M. 2018. Detailed analyses  
525 of stall force generation in *Mycoplasma mobile* gliding. Biophys J 114:1411-1419.
- 526 47. Shimizu T, Johnson KA. 1983. Presteady state kinetic analysis of vanadate-induced  
527 inhibition of the dynein ATPase. J Biol Chem 258:13833-40.
- 528 48. Burgess SA, Walker ML, Sakakibara H, Knight PJ, Oiwa K. 2003. Dynein structure  
529 and power stroke. Nature 421:715-8.
- 530 49. Maniloff J, Morowitz HJ, Barnett RJ. 1965. Ultrastructure and Ribosomes of  
531 *Mycoplasma gallisepticum*. J Bacteriol 90:193-204.
- 532 50. Miyata M, Uenoyama A. 2002. Movement on the cell surface of the gliding  
533 bacterium, *Mycoplasma mobile*, is limited to its head-like structure. FEMS  
534 Microbiol Lett 215:285-9.
- 535 51. Uenoyama A, Kusumoto A, Miyata M. 2004. Identification of a 349-kilodalton  
536 protein (Gli349) responsible for cytoadherence and glass binding during gliding of  
537 *Mycoplasma mobile*. J Bacteriol 186:1537-45.
- 538 52. Shoosmith JH, Sherris JC. 1960. Studies on the mechanism of arginine-activated

- 539 motility in a *Pseudomonas* strain. J Gen Microbiol 22:10-24.
- 540 53. Scheffer MP, Gonzalez-Gonzalez L, Seybert A, Ratera M, Kunz M, Valpuesta JM,  
541 Fita I, Querol E, Pinol J, Martin-Benito J, Frangakis AS. 2017. Structural  
542 characterization of the NAP; the major adhesion complex of the human pathogen  
543 *Mycoplasma genitalium*. Mol Microbiol 105:869-879.
- 544 54. Nakane D, Miyata M. 2007. Cytoskeletal “Jellyfish” structure of *Mycoplasma*  
545 *mobile*. Proc Natl Acad Sci USA 104:19518-19523.
- 546 55. Berg HC. 2003. The rotary motor of bacterial flagella. Annu Rev Biochem  
547 72:19-54.
- 548 56. Noji H, Ueno H, McMillan DGG. 2017. Catalytic robustness and torque generation  
549 of the F<sub>1</sub>-ATPase. Biophys Rev 9:103-118.
- 550 57. Fraser CM, Gocayne JD, White O, Adams MD, Clayton RA, Fleischmann RD, Bult  
551 CJ, Kerlavage AR, Sutton G, Kelley JM, Fritchman RD, Weidman JF, Small KV,  
552 Sandusky M, Fuhrmann J, Nguyen D, Utterback TR, Saudek DM, Phillips CA,  
553 Merrick JM, Tomb JF, Dougherty BA, Bott KF, Hu PC, Lucier TS, Peterson SN,  
554 Smith HO, Hutchison CA, 3rd, Venter JC. 1995. The minimal gene complement of  
555 *Mycoplasma genitalium*. Science 270:397-403.
- 556 58. Griniuviene B, Chmieliauskaite V, Grinius L. 1974. Energy-linked transport of

- 557 permeant ions in *Escherichia coli* cells: evidence for membrane potential  
558 generation by proton-pump. *Biochem Biophys Res Commun* 56:206-13.
- 559 59. Mates SM, Eisenberg ES, Mandel LJ, Patel L, Kaback HR, Miller MH. 1982.  
560 Membrane potential and gentamicin uptake in *Staphylococcus aureus*. *Proc Natl*  
561 *Acad Sci U S A* 79:6693-7.
- 562 60. Schiefer HG, Schummer U. 1982. The electrochemical potential across  
563 mycoplasmal membranes. *Rev Infect Dis* 4 Suppl: S65-70.
- 564 61. Lo CJ, Leake MC, Pilizota T, Berry RM. 2007. Nonequivalence of membrane  
565 voltage and ion-gradient as driving forces for the bacterial flagellar motor at low  
566 load. *Biophys J* 93:294-302.
- 567
- 568



569 **Figures**

570 Fig. 1 Gliding behaviors.

571 (A) Phase-contrast micrograph of *M. gallisepticum* cells. The cells on the glass are  
572 gliding in the direction of the membrane protrusion marked by white triangles. (B) Field  
573 image of phase-contrast micrograph (left) and cell trajectories for 30 s, changing color  
574 with time from red to blue (right). (C) Distribution of gliding speeds averaged for 60 s  
575 at 1 s intervals was fitted with a Gaussian curve ( $n = 231$ ). (D) Schematic illustration  
576 showing the measurement of gliding direction (left) and the distribution of gliding  
577 directions (right). Five consecutive cell images at 5 s intervals are shown in the same  
578 field. The cell axis and gliding directions are shown by black lines and yellow sectors,  
579 respectively. The cell glided in the direction indicated by the black arrow (left). The  
580 distribution was fitted with a Gaussian curve (right). (E) Dark-field micrograph of a cell  
581 attached with colloidal gold (left) and trajectories (right). Four consecutive images of a  
582 cell attached with colloidal gold at 10 s intervals are shown in the same field. The cell  
583 glided in the direction indicated by the white arrow (left). The trajectories of the mass  
584 centers of the cell and colloidal gold are indicated by black and red lines, respectively  
585 (right).

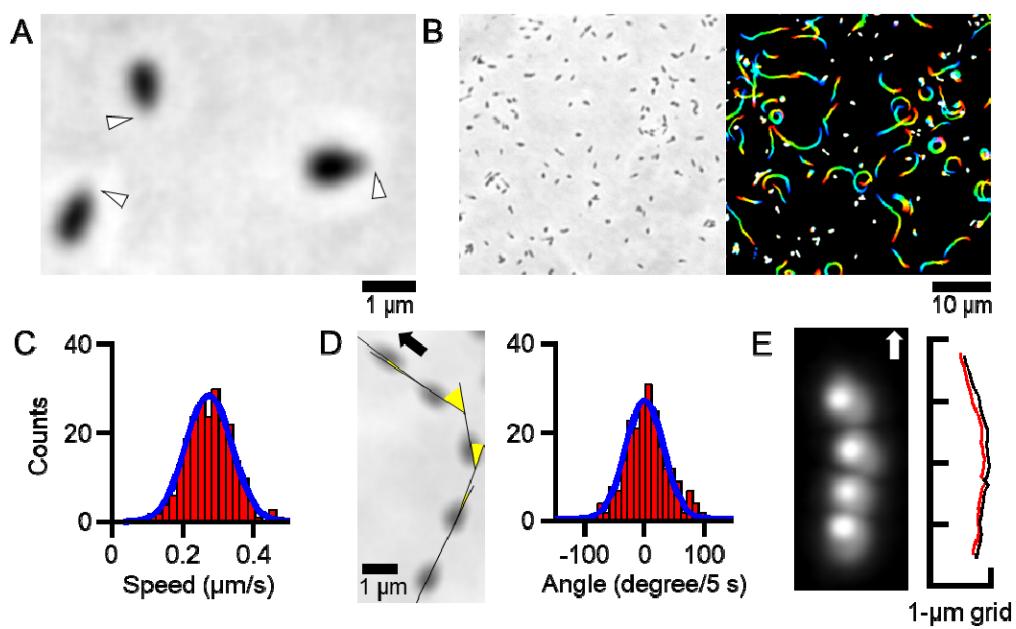

586

587

588 Fig. 2 Effects of MC and Ficoll on gliding.

589 (A) Cell trajectories for 60 s under PBS/G (top), 0.50% MC (middle) and 15% Ficoll

590 (bottom). The color changes with time from red to blue. (B) Distributions of gliding

591 speeds and directions under PBS/G (top), PBS/G containing 0.5% MC (middle) and

592 15% Ficoll (bottom) were fitted with Gaussian curves. (C) Gliding speeds and

593 directions under various concentrations of MC or Ficoll. The average gliding speeds for

594 60 s at 1 s intervals and the average gliding directions every 5 s for 60 s under PBS/G

595 containing 0%, 0.10%, 0.25%, 0.50% MC or 5%, 10%, 15% Ficoll conditions are

596 plotted with standard deviations. Black, red, and blue circles indicate PBS/G, MC, and

597 Ficoll, respectively.

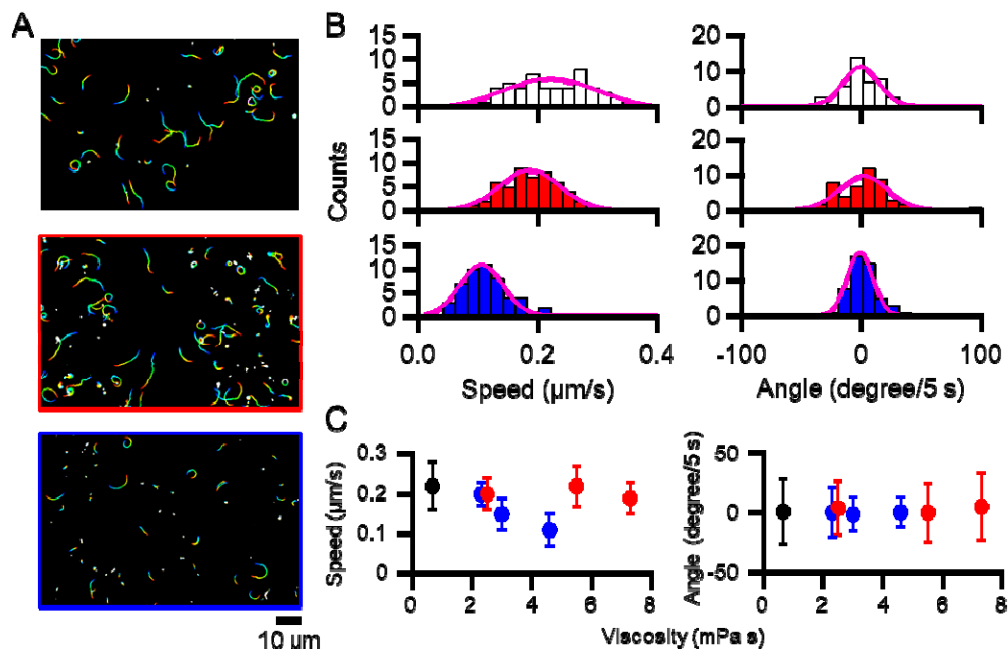

598

599

600 Fig. 3 Effects of SL on binding and gliding

601 (A) Cell trajectories for 60 s under various concentrations of SL. The color changes  
602 with time from red to blue. (B) Changes in gliding speeds by the addition of SL. Dotted  
603 lines indicate the time point when various concentrations of SL were added. The gliding  
604 speeds of individual cells are plotted as dots for every 10 s. ( $n_{\text{cells}} = 9, 9, 10, 6, 6, 9$  for 0,  
605 0.1, 0.2, 0.3, 0.4, 0.5 mM SL, respectively). The average gliding speeds are shown with  
606 solid lines. The gliding speeds from 0 to 10 s in each condition are normalized as 100%.  
607 (C) The gliding cell ratios under each SL concentration are plotted with standard  
608 deviations and fitted with a sigmoidal curve. (D) The gliding speeds under each SL  
609 concentration are plotted with standard deviations and fitted with a sigmoidal curve.

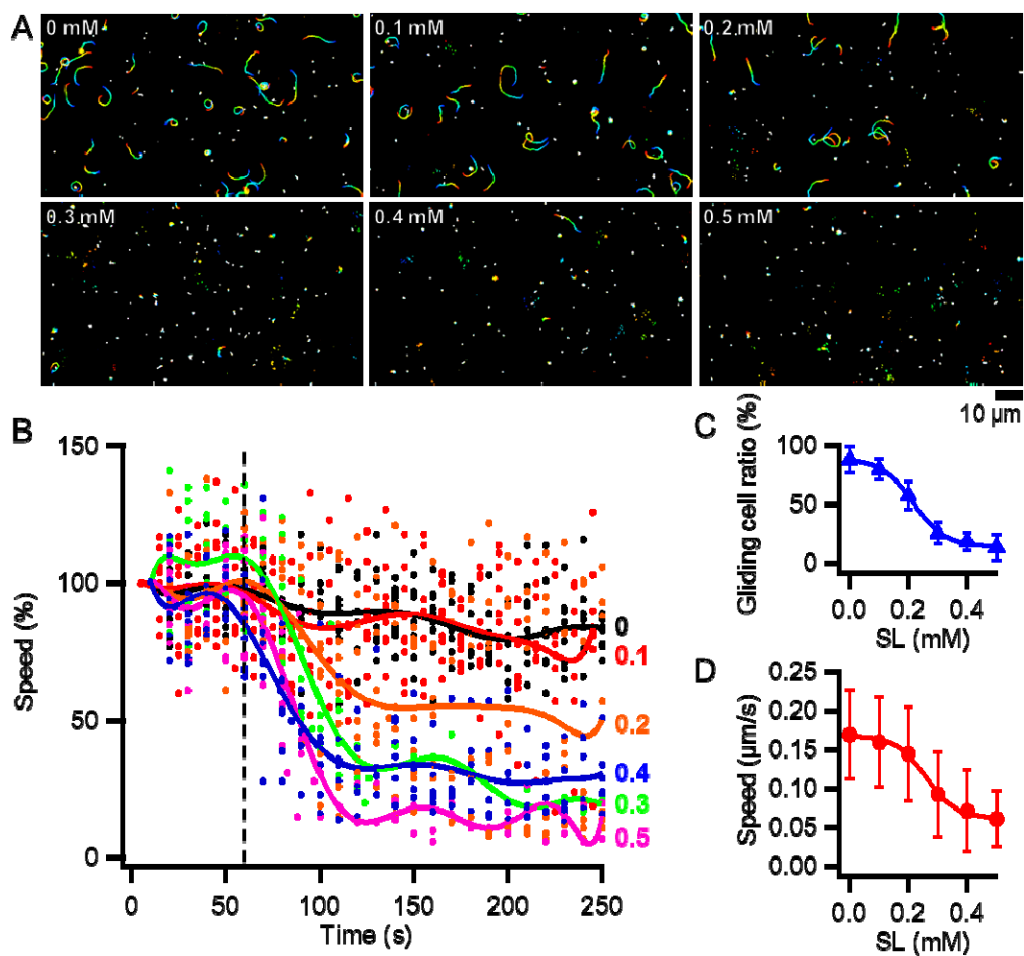

610

611

612 Fig. 4 Gliding ghost

613 (A) Trajectories for 250 s at 5 s intervals of all cells (left) and the cell to be the gliding  
614 ghost (right). The color changes with time from red to blue. The 0.007% Triton X-100  
615 containing 1 mM ATP + 0.01 mM ADP solution was added at 0 s. (B) Phase-contrast  
616 micrographs of intact (upper), pre-permeabilized (middle) and post-permeabilized cells  
617 (lower) marked with white triangles in (A). The time points after the addition of Triton  
618 solutions are shown in each panel. (C) Transitions of gliding speeds and cell-image  
619 densities. The average gliding speeds and cell-image densities for 10 s at 1-s intervals  
620 are plotted as black circles and gray triangles, respectively. The average cell-image  
621 densities from -60 to -50 s is normalized as 100%. 'Tri' and 'Per' indicate the time  
622 points when 0.007% Triton X-100 containing 1 mM ATP + 0.01 mM ADP solution was  
623 added, and the density shift occurred, respectively. (D) The phase-contrast micrograph  
624 of cells treated with Triton solution. Cells showed three levels of cell-image density  
625 shifts; the image density did not decrease (right-upper), the image density decreased to  
626 be about 75% of the intact cell (left-upper), and the image density decreased to half of  
627 the intact cell (left-lower). (E) Distribution of cell-image densities at 90 s after the  
628 addition of Triton solution was fitted by the sum of three Gaussian curves. The  
629 individual Gaussian curves and the sum of three Gaussian curves are indicated by black

630 broken and magenta solid lines, respectively. The cell-image density before Triton  
631 treatment is normalized as 100%. The positions of peak tops are indicated by black  
632 triangles. (F) Ghosts constructed by Triton X-100 solutions including nucleotides. Intact,  
633 pre-permeabilized, post-permeabilized, and trajectories of ghosts for 15 min are shown  
634 from left to right panels. The color changes with time from red to blue. The time points  
635 after the addition of Triton solutions are shown in each panel. The cells indicated by  
636 black circles decrease for the cell-image densities to be about 75% at  
637 post-permeabilized panels. (G) Distribution of gliding speeds of ghosts constructed by  
638 0.007% Triton X-100 containing 1 mM ATP + 0.01 mM ADP solution fitted with a  
639 Gaussian curve. (H) The average gliding speeds of ghosts constructed with Triton  
640 X-100 solution including ATP or ATP- $V_i$  are shown with standard deviations. (I) The  
641 occurrence ratios of gliding ghosts to all intact cells are shown. (J) The ratios of ghosts  
642 which continued to glide through 17 min of video recording are shown.

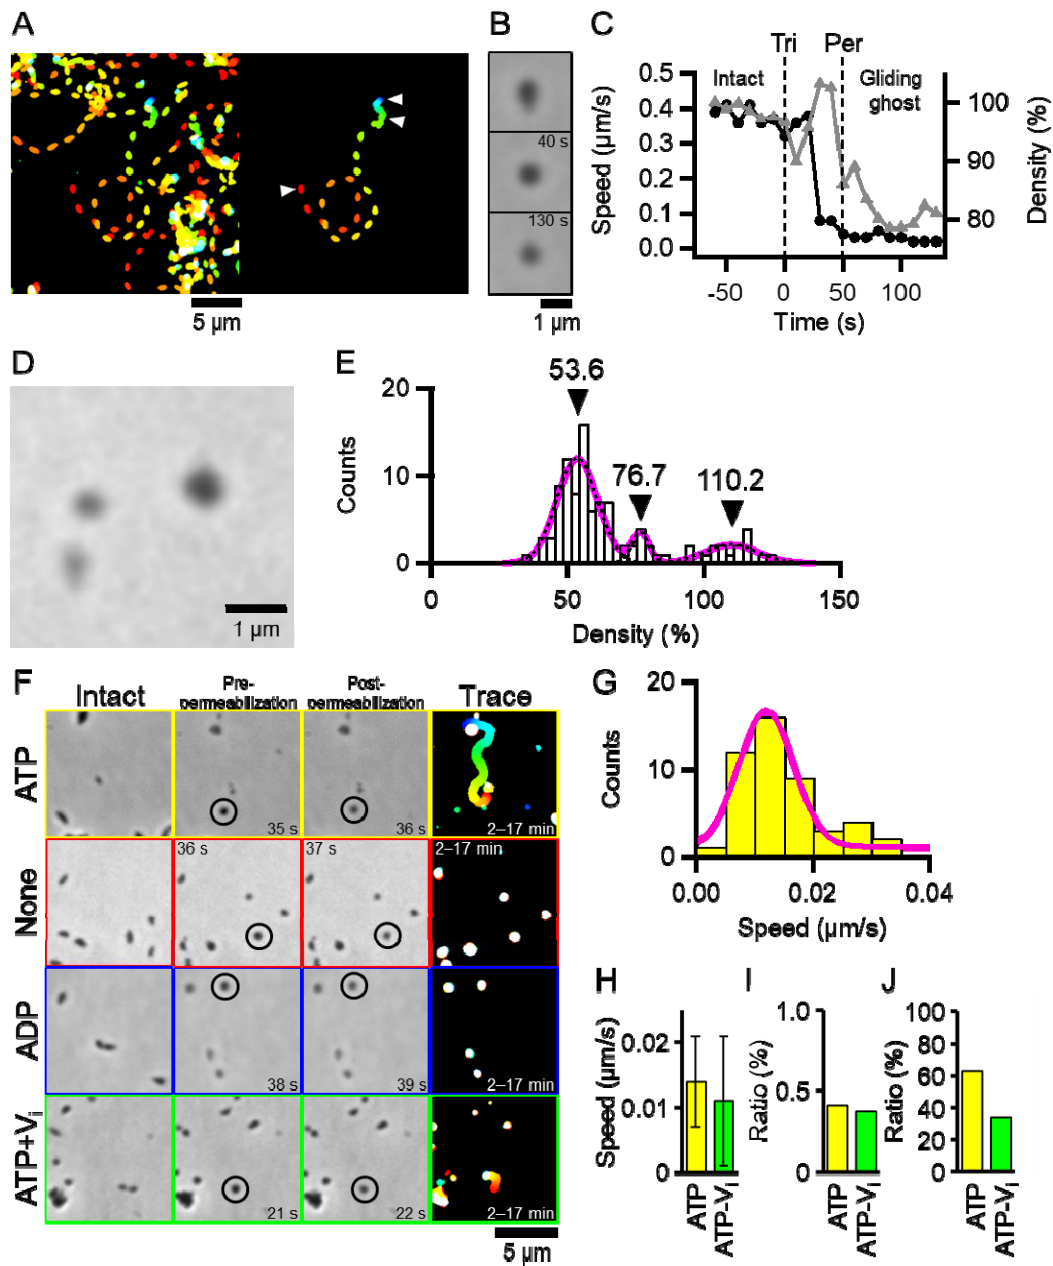

643

644



645 Fig. 5 Negative-staining electron micrographs of cell permeabilization.

646 (A) Intact cells. The cells featured by the bleb and infrableb are shown. (B–E) Cells

647 treated with 0.007% Triton X-100 containing 1 mM ATP + 0.01 mM ADP. Some of the

648 permeabilized cells have large (C) or small (D) holes marked by yellow triangles. (E)

649 Magnified images of red boxed areas in (D). A–D show the same magnification. Two

650 examples of images are shown for each category.

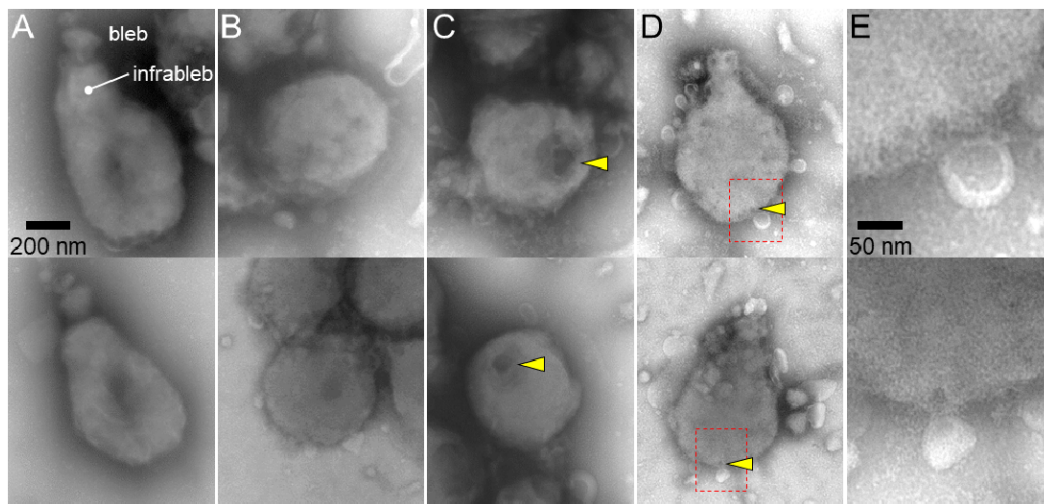

651

652

653

654 Fig. S1 Gliding motility of cells attached with colloidal gold.

655 (A) The field image of dark-field microscopy. The yellow triangles indicate the

656 examples of colloidal gold attached to cells. (left). The cell trajectories for 60 s,

657 changing color with time from red to blue (right). (B) The distributions of gliding

658 speeds with (upper) and without colloidal gold (lower). The averaged gliding speeds

659 with standard deviations are shown in each panel. (C). Four consecutive dark-field

660 micrographs of a cell attached with a colloidal gold at 20 s intervals are shown in the

661 same field. The cell glided in the direction indicated by a white arrow. These

662 micrographs are shown in scale with (D). (D) The trajectories of the mass centers of

663 cells and colloidal gold are indicated by black and red lines, respectively. (E) Distances

664 between the mass centers of cells and colloidal gold are indicated by blue lines.

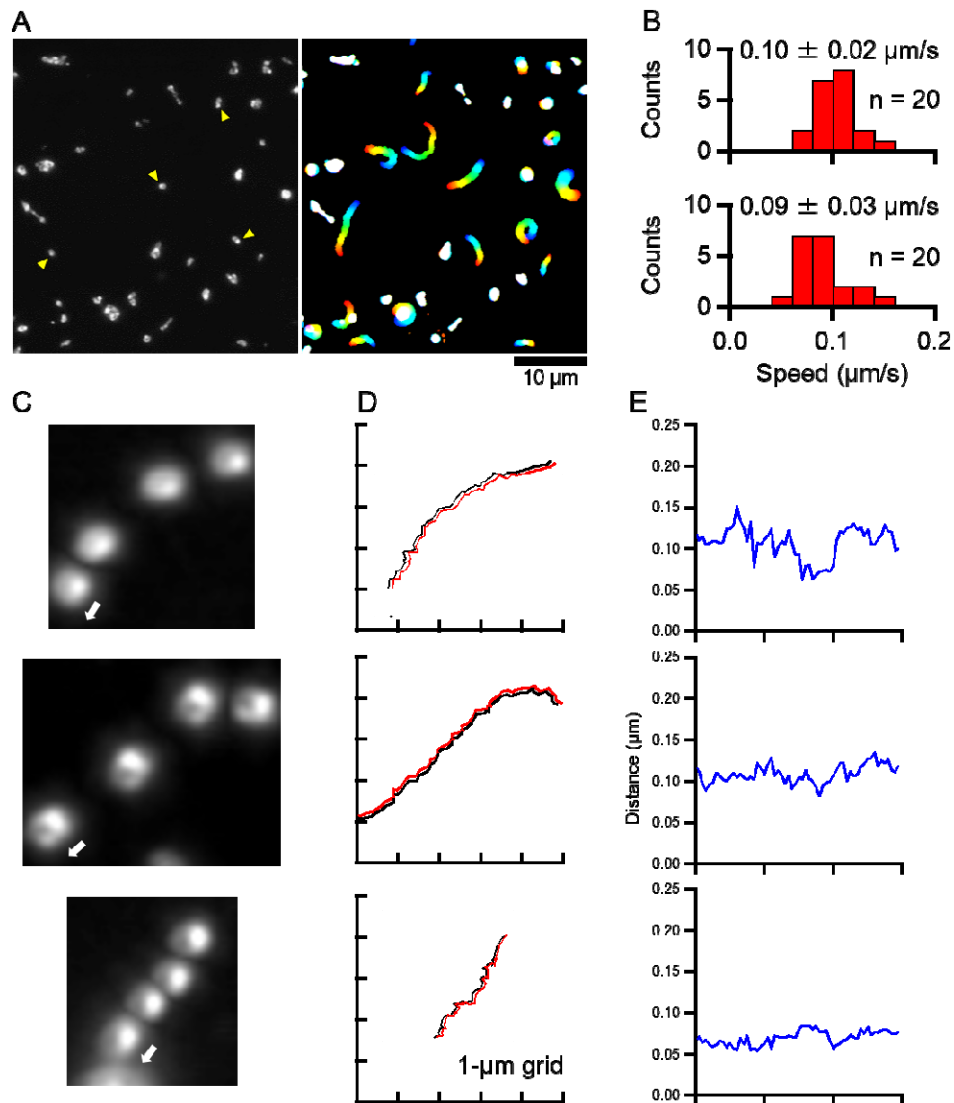

665

666 Fig. S2 Cells rotating around the end of the membrane protrusion under 0.5 mM SL.

667 (A) Sequential phase-contrast micrographs of a cell at 1 s intervals. (B) The mass center

668 of the cell was traced at 5 ms intervals for 30 s. (C) Time courses against the X-axis

669 (upper) and Y-axis (lower) of panel B.

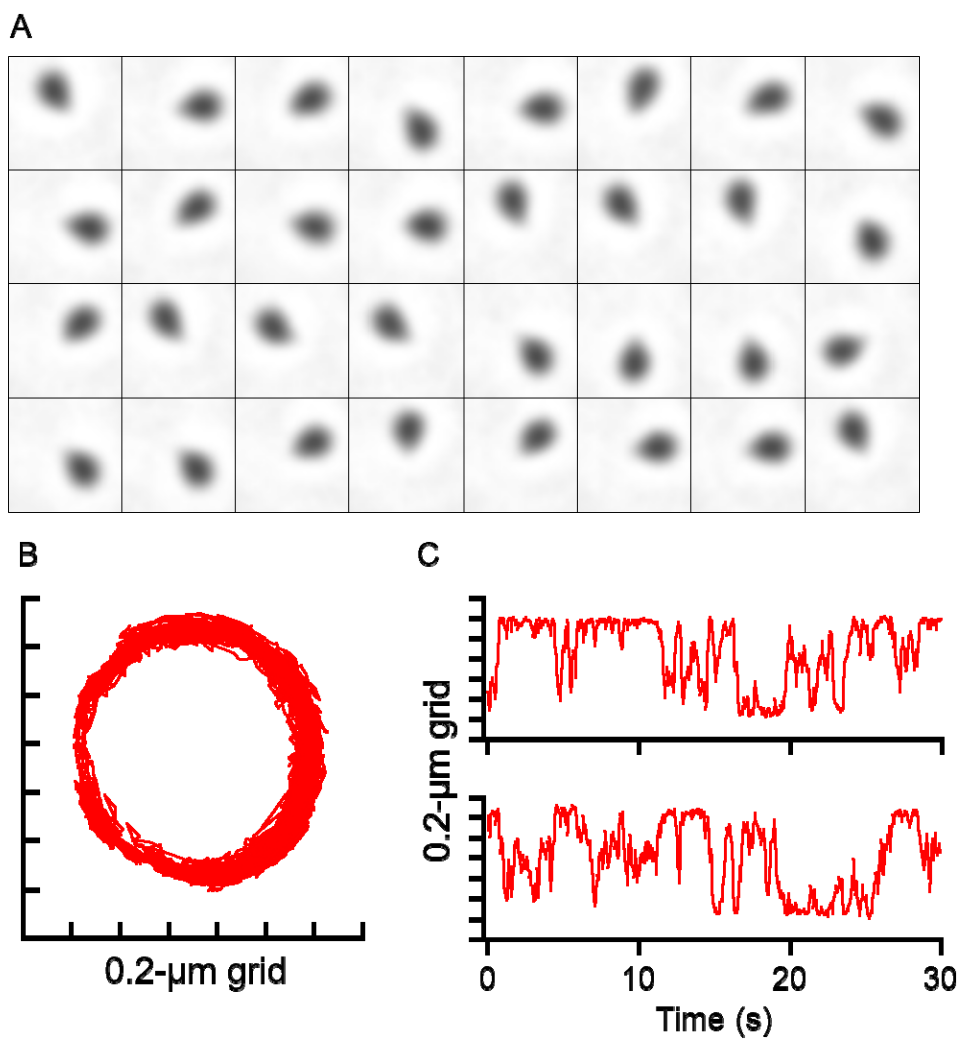

670

671

672 Fig. S3

673 Hill plot analysis of data in Fig. 3C.

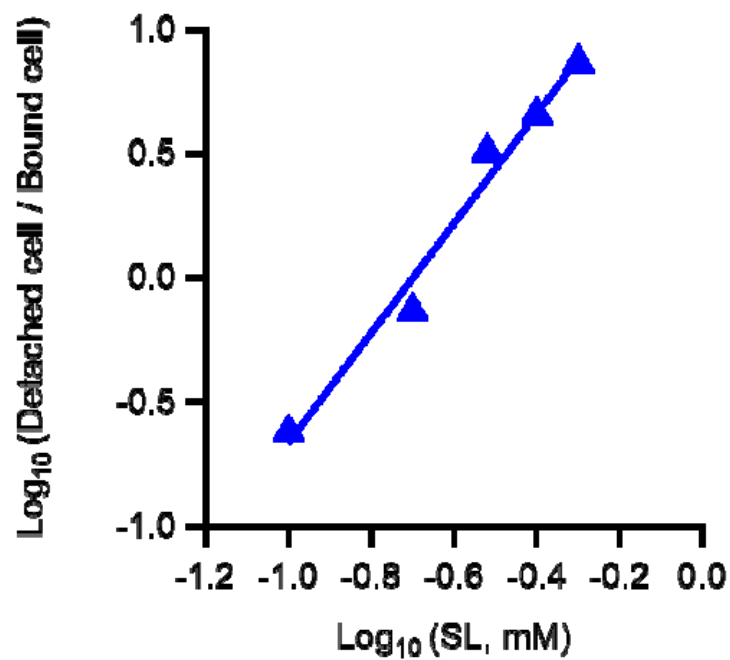

674

675

676 Fig. S4 Gliding motility under bufferA.

677 (A) Field image of phase-contrast micrograph (left) and cell trajectories for 30 s,

678 changing color with time from red to blue (right). (B) Distribution of gliding speeds

679 averaged for 60 s under bufferA was fitted with a Gaussian curve. (C) Distribution of

680 gliding directions under bufferA was fitted with a Gaussian curve.

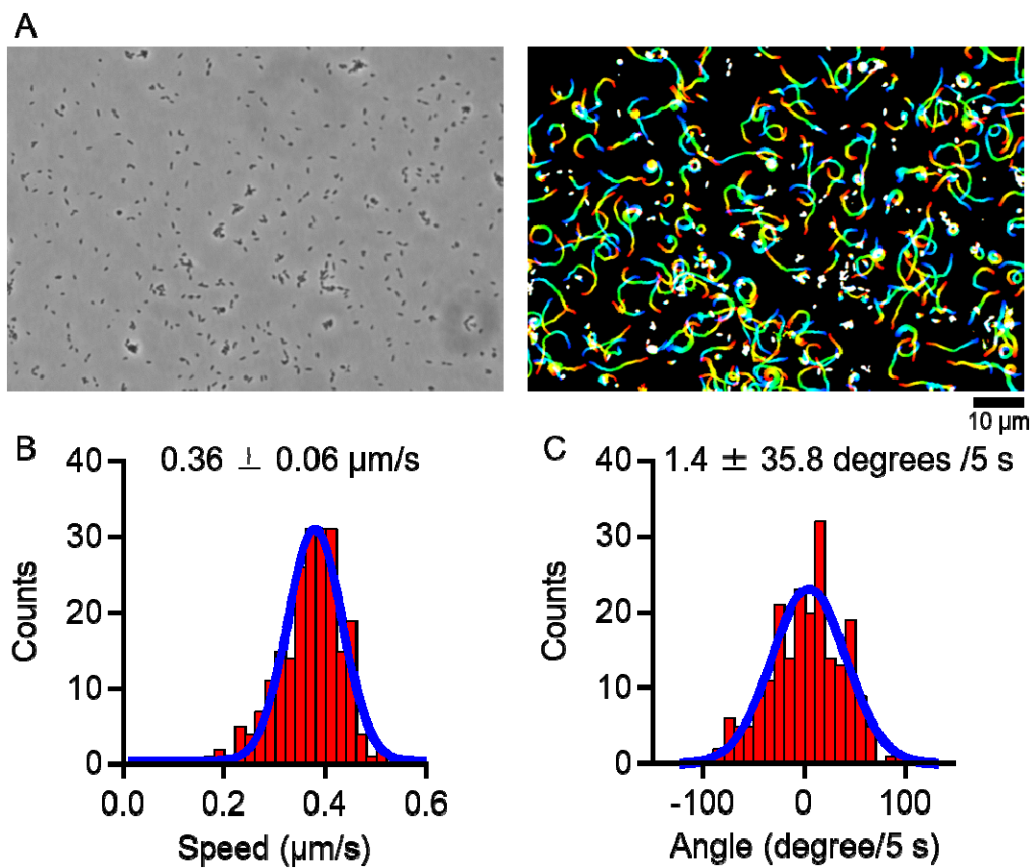

681

682

683 Fig. S5 Transition of cell-image density in gliding ghost experiments.

684 (A) Distributions of cell-image densities at 30, 60, and 120 s after the addition of Triton

685 solution was fitted by the sum of two or three Gaussian curves. The individual Gaussian

686 curves and the sum of the Gaussian curves are indicated by black broken and magenta

687 solid lines, respectively. The cell-image density before Triton treatment is normalized as

688 100%. The positions of peak tops are indicated by black triangles. (B) Trajectories at 5 s

689 intervals of all cells (left) and the cell to be the gliding ghost (right). The color changes

690 with time from red to blue. The 0.007% Triton X-100 containing 1 mM ATP + 0.01 mM

691 ADP solution was added at 0 s. (C) Phase-contrast micrographs of intact (upper),

692 pre-permeabilized (middle) and post-permeabilized cells (lower). The time points after

693 the addition of Triton solutions are shown in each panel. (D) Transitions of gliding

694 speeds and cell-image densities. The average gliding speeds and cell-image densities for

695 10 s at 1 s intervals are plotted as black circles and gray triangles, respectively. The

696 average cell-image densities of the first 10 s are normalized as 100%. ‘Tri’ and ‘Per’

697 indicate that the time points when 0.007% Triton X-100 containing 1 mM ATP + 0.01

698 mM ADP solution was added, and the density shift occurred, respectively. Two

699 examples are shown for each category.

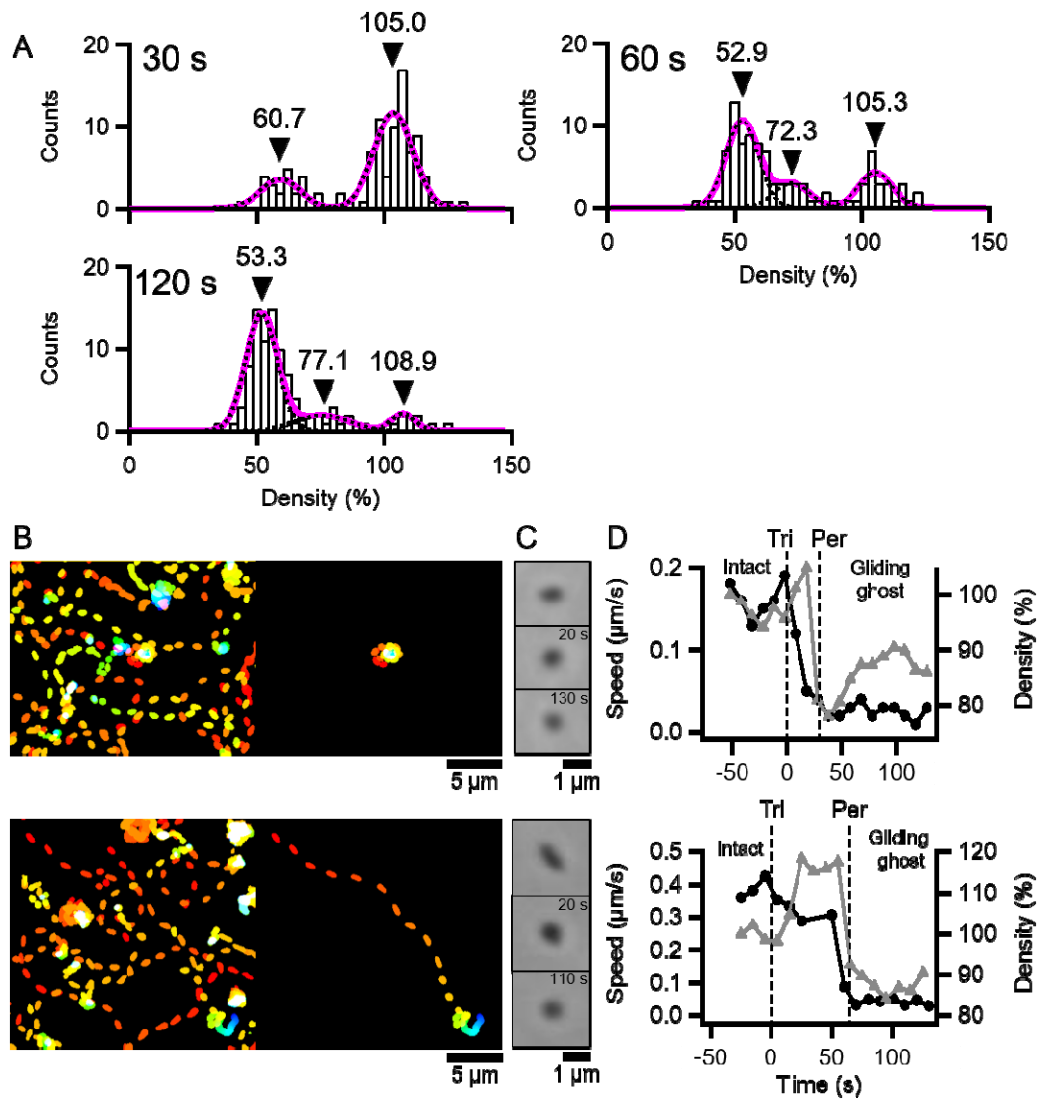

700

701



702 Movie S1

703 Gliding *M. gallisepticum* under normal conditions. The movie is 5× speed.

704

705 Movie S2

706 Gliding *M. gallisepticum* attached with colloidal gold. The movie is 5× speed.

707

708 Movie S3

709 Gliding ghost of *M. mobile* under ATP. The movie is 2× speed.

710

711 Movie S4

712 Gliding ghost of *M. mobile* under ADP. The movie is 2× speed.

713

714 Movie S5

715 Gliding ghost of *M. gallisepticum* under ATP. The movie is 30× speed.

716
